**Study Title:** The Bambisana Study Protocol: A mixed methods pre- and post- test study assessing community and social media influence to increase influenza vaccination uptake among youth in Soweto, South Africa

**Authors:**

Janan J. Dietrich<sup>1,2\*</sup>, Catherine Hill<sup>3\*</sup>, Gugulethu Tshabalala<sup>1,4</sup>, Tshepiso Msibi<sup>3</sup>, Stefanie Vermaak<sup>1,4</sup>, Nellie Myburgh<sup>3</sup>, Sarah Malycha<sup>5</sup>, Izzy Goldstein<sup>5</sup>, Elliot Grainger<sup>5</sup>, Prima Alam<sup>5</sup>, Kimberley Gutu<sup>3</sup>, Kennedy Otwombe<sup>4,6</sup>, Heidi J. Larson<sup>5,7</sup>, Ziyaad Dangor<sup>3</sup>

**Affiliations**

1. African Social Sciences Unit of Research and Evaluation (ASSURE), Faculty of Health Sciences, University of the Witwatersrand, Johannesburg, South Africa
2. Health Systems Research Unit, South African Medical Research Council, Bellville, South Africa
3. South African Medical Research Council Vaccines and Infectious Diseases Analytics Research Unit, University of the Witwatersrand, Johannesburg, South Africa
4. Perinatal HIV Research Unit (PHRU), School of Clinical Medicine, Faculty of Health Sciences, University of the Witwatersrand, Johannesburg, South Africa
5. Department of Infectious Disease Dynamics, London School of Hygiene & Tropical Medicine, London, United Kingdom
6. School of Public Health, Faculty of Health Sciences, University of the Witwatersrand, Johannesburg, South Africa
7. University of Antwerp and KU Leuven, Belgium
8. School of Public Health, Faculty of Health Sciences, University of the Witwatersrand, Johannesburg, South Africa

\*Joint first authorship

Corresponding Author: Janan Dietrich, [janan.dietrich@wits.ac.za](mailto:janan.dietrich@wits.ac.za)

50 **Abstract**

51 **Background**

52 Seasonal influenza has an estimated global reach of 3 to 5 million infections with 290 000 to 650 000  
53 influenza-related deaths yearly. Despite its efficacy in reducing morbidity and mortality, influenza vaccination  
54 rates remain low globally and in South Africa. Youth between the ages of 18-34 years are not prioritised for  
55 influenza vaccines although influenza surveillance in South Africa shows that individuals aged 19 to 44  
56 present the highest asymptomatic episodes and the lowest medically attended illness. This creates an  
57 opportunity to investigate if and how vaccine demand can be created in the absence of clear imperatives to  
58 vaccinate. The study tests the effectiveness of tailored, context-specific education, community engagement,  
59 including community and social media to increase influenza vaccination uptake. Tailored, context-specific  
60 education, community engagement, reliable vaccine supply and free, localised access are all critical for  
61 improving perceptions of, increasing confidence in, and motivating uptake of vaccination. This study explores  
62 strategies to increase vaccine uptake amongst marginalised youth 18-34 years old in Soweto, South Africa,  
63 where influenza vaccines are not universally accessible through the public health system for this age group.

64 **Methods**

65 The Bambisana Study uses an innovative approach - including community influencers and social media - to  
66 increase uptake of influenza vaccines through designing and testing an integrated communications strategy  
67 targeted at marginalised youth in Soweto, South Africa. The Bambisana study uses a mixed methods pre-test,  
68 post-test intervention design to test the effects of the interventions.

69 **Conclusion and Significance**

70 Enhancing perceptions of, bolstering confidence in, and fostering uptake of vaccination relies heavily on the  
71 efficacy of yearly influenza vaccination initiatives, personalized education tailored to specific contexts, active  
72 community involvement, consistent vaccine availability, and easily accessible, cost-free distribution channels  
73 at the local level.

74  
75 **Keywords:** Influenza, Vaccines, Vaccine Confidence, Youth, South Africa, Social Media  
76  
77  
78  
79  
80  
81  
82  
83  
84  
85  
86  
87  
88  
89  
90  
91  
92  
93  
94  
95  
96  
97  
98  
99  
100

## 101 Introduction

102 Globally seasonal influenza causes an estimated 3-5 million infections, and 290 000-650 000 deaths annually  
103 [1, 2]. Estimates for influenza burden of disease are limited in Africa; however, hospitalisation and mortality  
104 are higher in low- and middle-income countries (LMICs) than in high-income countries (HICs) [3, 4]. In South  
105 Africa, an estimated 6 000-11 000 people die from influenza every year, with approximately half of these  
106 deaths in the elderly, and people living with HIV [5]. Seasonal outbreaks of influenza pose challenges to the  
107 healthcare system, leading to increased hospitalizations, outpatient visits, and strain on healthcare resources  
108 [6]. Vulnerable populations, including the elderly, young children, pregnant women, and individuals with  
109 underlying medical conditions are at highest risk of severe infection [7].

110  
111 While non-pharmaceutical interventions can play a role in decreasing influenza infections, vaccination is  
112 deemed pragmatic and endorsed by the World Health Organization (WHO) as the recommended method for  
113 preventing seasonal influenza [1]. Overall vaccine efficacy to prevent influenza infection ranges from 40-  
114 60%, with higher vaccine efficacy (82%) in reducing severe illness and hospitalization [8, 9]. Therefore, the  
115 influenza vaccine is especially recommended for those who have chronic illnesses, those who are pregnant,  
116 and the elderly [10-12]. Influenza vaccination campaigns typically prioritize these groups during the influenza  
117 vaccination season [7, 13]. However, an investigation into the seasonal influenza burden in urban and rural  
118 areas in South Africa showed that children younger than 12 years and those 19 and 44 years – have an elevated  
119 risk of acquiring seasonal influenza [14]. Whilst severe disease is less likely, vaccinating younger adults has  
120 the added indirect benefit of providing herd immunity to the family and communities [15, 16]. Furthermore,  
121 vaccination offers the potential economic benefit related to the out-of-pocket expenses incurred by patients to  
122 treat influenza related symptoms. An estimated annual cost of \$111.3 million is incurred by the government,  
123 while out of pocket costs incurred by the patient were reported to be \$40.7 million [17]. Individuals are at risk  
124 of financial loss due to absence at work and missed opportunity for those who are self-employed [18]. Despite  
125 recommendations, seasonal influenza vaccine uptake, in the most vulnerable groups, is low in LMICs,  
126 including South Africa [19]. Accessibility, lack of knowledge and risk perception have been cited as the most  
127 significant barriers to vaccination in South Africa [20].

128  
129 Despite the demonstrated effectiveness of vaccines in significantly reducing morbidity and mortality of  
130 affected individuals, youth are less proactive in health-seeking behaviours due to low risk perception, are not  
131 necessarily encouraged to vaccinate for influenza and other infectious diseases [9, 21-23]. For COVID-19,  
132 youth were not initially prioritised for vaccination roll-out yet they might have been in contact with vulnerable  
133 populations [24, 25]. Additionally, evidence suggests that low vaccination rates are in part due to low health-  
134 seeking behaviours among youth. Health-seeking behaviours are the actions involved in achieving and  
135 maintaining a healthy condition. [26, 27]. Various factors, both individual and related to healthcare providers,  
136 can influence young people's healthcare-seeking behaviours [28].

137  
138 Targeted health promotion interventions can increase health-seeking behaviour and uptake of vaccination [29].  
139 Influenza surveillance shows that individuals aged 19 to 44 present the highest asymptomatic episodes and  
140 the lowest medically attended illness [14, 30]. Studies undertaken in sub-Saharan Africa have shown that  
141 leveraging community involvement in immunization programs positively contributes to vaccine confidence  
142 and uptake [31, 32]. In the case of HIV, for example, awareness campaigns to lower the burden of HIV and  
143 AIDS epidemics in Southern African countries have proven vital in reducing the rise of disease [33]. The use  
144 of television series to promote positive sexual health and prevent HIV effectively engaged the youth by  
145 challenging old models of education [34]). The use of social media campaigns have also been increasingly  
146 used to promote behaviour change [35, 36], while sparking debate, especially when considering the abundance  
147 of false and misinformation [37]. It is vital to consider the significance of social media to improve vaccine  
148 uptake in LMICs.

149  
150 Promoting health care through various platforms and to youth in LMICs may improve uptake of vaccination.  
151 Therefore, as part of the Bambisana Project, which includes a diverse and multi-disciplinary team comprising  
152 social and behavioural scientists, biostatisticians, population health surveillance specialists, health

153 communications researchers, community influence and engagement practitioners, and marketing and  
154 communication strategists, we aim to:

- 155  
156 (1) Evaluate the impact of influencer's online, offline, and in collaboration, on influenza vaccine uptake, with  
157 a specific focus on young people, and assess the additional value added by social media engagement;  
158 (2) To design and implement an integrated communications strategy centred around community influencers  
159 and social media to increase the uptake of influenza vaccines, particularly among younger populations who  
160 are likely unemployed, partially or informally employed and living in Soweto, South Africa;  
161 (3) To explore motivations and barriers to health priorities, and to influenza vaccination, through the use of  
162 micro-influencers both online and offline in Soweto, South Africa.

163  
164 The outcomes of the project will include increased influenza vaccination rates at the local healthcare clinics  
165 linked to campaign interventions, alongside an improved attitude towards the importance of vaccination in the  
166 target audience - this will be assessed using the Vaccine Confidence Index scale [38] and measured against the  
167 most recent Vaccine Confidence Index data from South Africa [39]. Additionally, the project will provide  
168 important health systems-strengthening recommendations which could potentially be implemented within  
169 current infrastructure.

## 171 **Materials and Methods**

### 172 **Research Design**

173 The primary research aim uses a prospective mixed methods study design including qualitative and  
174 quantitative data collection, to assess the effects of community and social media interventions to increase  
175 influenza vaccination uptake among youth in Soweto, South Africa. During the intervention phase, surveys  
176 will be conducted among clinic attendees accepting as well as declining influenza vaccination within the study  
177 clinics.

### 178 **Study setting**

179 The study is conducted in Soweto (South-Western Townships) which is a congregation of 29 townships within  
180 the Johannesburg Metropolis in South Africa [40]. Soweto is one of the poorest areas of Johannesburg with  
181 high rates of youth unemployment which is at 46.3% among the 15-34 year age group [41]

### 183 **Sampling**

184 The Bambisana Project leverages the Soweto Health Demographic Surveillance System (HDSS), led by Wits  
185 VIDA since 2017 and part of the Child Health and Mortality Prevention Surveillance programme (CHAMPS),  
186 provides access to longitudinal health and demographic data for specific enumerated areas of Soweto and the  
187 South of Johannesburg, since 2017 [42]. The study population includes young adults 18-34 years from four  
188 HDSS economically marginalised and geographically distinct Soweto communities: namely Phiri/Senaone  
189 and Mapetla, Mofolo and Meadowlands, Thulani, and neighbouring Thembelihle. Adults (18 years and older),  
190 living in these clusters or accessing clinic services in the five study clinics (Senaone Clinic, Mofolo  
191 Community Health Centre, Meadowlands Zone 2 Clinic, Siphumlile Clinic, and Thembelihle Clinic) are  
192 deemed eligible for the study. The HDSS communities were included as below (Table 1):

193  
194 Table 1: HDSS cluster summary data

| Cluster # | Communities             | Total Population | Youth 18-34 | # households with youth | Total # of households |
|-----------|-------------------------|------------------|-------------|-------------------------|-----------------------|
| Cluster 1 | Mofolo and Meadowlands  | 20986            | 5824        | 3478                    | 5912                  |
| Cluster 2 | Mapetla & Phiri/Senaone | 23805            | 6801        | 4037                    | 6626                  |
| Cluster 3 | Thulani                 | 23711            | 6848        | 4072                    | 6262                  |
| Cluster 4 | Thembalihle             | 19449            | 5648        | 3831                    | 6586                  |

195

196

197 Figure 1: Study Design

**PROJECT TIMELINE: DATA POINTS & STUDY DESIGN**

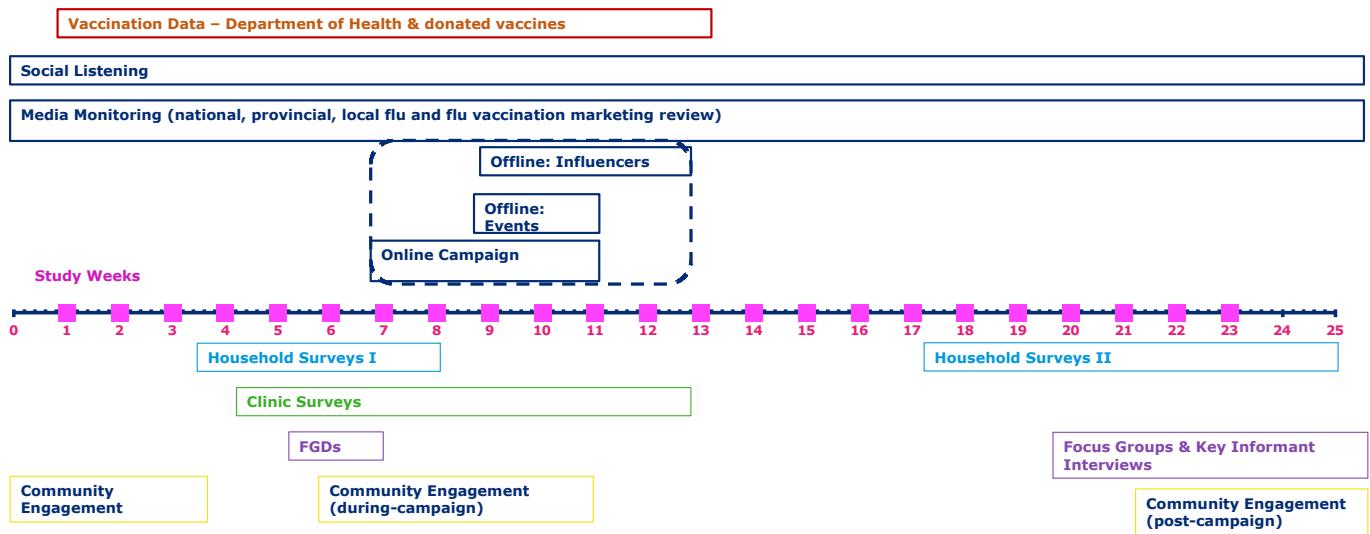

198

199

**Community engagement**

200

201

202

203

204

205

206

207

208

The Bambisana [an isiZulu word – which means to work together] study leverages active, long-standing, dynamic community-level relationships and partnerships in accessing community insights at the household and local clinic level. The Wits VIDA social behavioural sciences team has longstanding relationships through Community Advisory Boards (CAB) and extensive community engagement in support of health research objectives throughout Soweto. CAB members are individuals residing in the HDSS enumerated areas who have been identified as active citizens in their communities. There are standing quarterly CAB meeting with the study team and members, however, these often increase in relation to shifting project activities. Consultations span project development, implementation, and community feedback sessions at the end of data collection, analysis and interpretation.

209

210

**Formative qualitative data collection**

211

212

213

214

215

The qualitative component includes 16 focus group discussions (FGD) stratified by age group (18-24, 25-34), sex (male and female) and community (two per cluster). These approaches aim to gather contextual data essential for understanding the factors influencing young people's decisions regarding influenza vaccination, including both motivators and barriers.

216

217

218

219

220

221

222

Study staff will purposively select and recruit young people for FGDs and key stakeholders/influencers from the community for key informant interviews (KIIs). FGD recruitment will be iterative until data saturation is achieved [43]. All study participants will be recruited through the Community Advisory Board members who work with HDSS communities. Trained and experienced qualitative researchers fluent in local languages spoken in Soweto and Thembelihle (including isiZulu and Sesotho) will conduct the qualitative research using the participants' language of choice. The FGDs and KIIs will be audio-recorded after written informed consent is obtained.

223

224

225

- FGDs: 16 FGDs (8-12 participants per FGD)
- KIIs: 20 (10 male and 10 female participants)

226

227



## 228 **Intervention**

229 The intervention will be delivered through a public health messaging campaign in targeted clusters or ‘sub-  
230 places’ in Soweto, leveraging micro-influencers to provide information and motivate positive attitudes for  
231 vaccination without mandate in currently unvaccinated populations. The aim of the campaign is to create a  
232 behavioural change action: to go to your local clinic to get vaccinated. This has the secondary aim of  
233 highlighting the extent to which such interventions might be possible on wider issues of public health in the  
234 future. Secondary to this is the desire to investigate the value-add of social media targeting over wider forms  
235 of engagement, such as that which occurs in communities offline.

236 The campaign will be timed with points when the clinic is well supplied and prepared for such a public drive.  
237 The project will mitigate against the risk of potential vaccine shortages by making vaccine donations to partner  
238 clinics. The study will centre around the 2023 national influenza vaccination drive in 2023. Vaccines are  
239 generally provided in very short and sporadic supply to the local community clinics, so supplying vaccines is  
240 also part of the objective to make community-level impact as part of the project.

241 The intervention will be implemented after community engagement discussions have been conducted to obtain  
242 information which would be used to design the messaging and communication strategy. Surveys will be  
243 administered prior to, during, and following the communication interventions to establish baseline, midline,  
244 and endline measures for evaluating the intervention's impact. This will help assess the effectiveness of four  
245 distinct approaches aimed at boosting influenza vaccine uptake among youth across clinics in four diverse  
246 HDSS clusters.

- 247 1. **Standard of care:** Vaccine made available with standard government promotional activity without  
248 support from the project (i.e., based on standard government drive).
- 249 2. **Social media:** Social media campaign to highlight availability and drive to get vaccinated pushed to  
250 the target audience.
- 251 3. **Micro-influencers on and offline:** The social media campaign will be amplified through a  
252 coordinated effort by micro-influencers in their online and offline networks.
- 253 4. **Offline micro-influencers:** Non-social media focused; offline micro-influencer led engagement  
254 within communities.

255 The intervention components are detailed below:

### 256 **1) Social media campaign to highlight availability and drive to get vaccinated pushed to the target 257 audience (under 35s) in four distinct geographic areas**

259 Utilizing Meta platforms Facebook and Instagram, along with other relevant social media channels identified  
260 through community engagement and marketing insights, we will disseminate information through static  
261 images, carousel posts, and video posts to promote the availability of, education around, and motivation to get  
262 vaccinated. Paid advertising on Meta will target people aged 18-34 in two of the four distinct geographic study  
263 clusters.

### 264 **2) Micro-influencers on and offline: The social media campaign will be amplified through a coordinated 265 effort by micro influencers in their online and offline networks**

267 We will use community influencers - people with traditional influence such as community leaders, religious  
268 leaders, elders, and key business leaders - to amplify our social media campaign. They will engage their online  
269 and offline networks in coordination with our social media campaign to promote vaccine availability and  
270 encourage vaccination.

271

272

### 3) Offline micro-influencers: Non-social media focused; offline micro-influencer led engagement within communities

In these communities, our community influencers will focus only on offline engagement and will be specifically instructed to not do anything on social media. Using interpersonal conversations, and small-scale community events to share the importance of vaccines, they will encourage people to get vaccinated.

#### Quantitative Data Collection

Quantitative data collection will include five survey data points as outlined below.

All surveys will be developed using the REDCap software, a computer-assisted survey platform with built-in data encryption [44]. All surveys will be completed using dedicated study tablets which means participants would not be required to use their own internet data. Additionally, we will use a data-free survey completion option. The survey links would also be sent to participants who wish to complete the surveys on their own devices. There will be no data costs to participants for completing the assessments. Participants will be reimbursed ZAR 50 airtime towards their time.

A) **Household surveys** include two time points of data collection, a pre- and post-test design, as described below.

#### Sampling

Households were chosen through a simple random sampling method, and eligible participants were enrolled as follows: a minimum of 800 adult men and women aged 18 years and above, with 400 designated for the pre-test and 400 for the post-test. At least 100 households with index participants aged 18-34 years will be approached per community. Non-index participants, include other adults in the households who are aged 18-34, 35-49 and 50 years and older who will also be invited to complete surveys.

**Pre-test and post-test surveys:** Using a random sample of households having youth participants (18-34 years) generated from the HDSS database, adults will be approached in their households to complete a 15 minute online pre-test assessment survey to measure: socio-demographics (age, gender, food security, potential loss of income), knowledge of influenza vaccines and benefits, health beliefs and sources of health information (social media, television, radio, friends and family), and vaccine confidence[45]. The same households will be invited to participate in the post-test household survey. The post-test household survey will be conducted after the study campaign intervention.

B) **Clinic surveys** include data collection with vaccinators and those who declined vaccination as described below:

**Vaccinated:** All adults 18+ years, who received an influenza vaccination will be approached as such numbers may vary as this depends on who elects to vaccinate. However, a total of at least 400 (n=100 per community) youth (aged 18-34) participants who go to the intervention clinics will be purposively approached to complete a post vaccination assessment. The study team will work closely with healthcare workers at public health clinics in the study communities. Healthcare workers will refer patients after having received the influenza vaccine, on site at the clinics. These participants will be invited to complete a brief survey using the same measures as specified for the pre-test survey. The data will be covered as part of the project expenses. There will be no data costs to participants for completing the assessments. Participants will be reimbursed ZAR 50 airtime towards their time.

Additional measures will assess: motivations for influenza vaccines, where participants heard/learned about this or other drives for the influenza vaccination, if participants had seen any online messaging driving them to get the influenza vaccine or been exposed to specific community engagement activities, and whether it had influenced their decision to vaccinate, and online impressions, for example, video views rates (dependent on

final campaign strategy and media mix) and their impact on vaccinations in that region. Uptake of influenza vaccines will be tracked in the four clusters across the study period.

**Clinic attendees who decline vaccination** will also be approached to complete surveys. These participants will be 18+ years. Healthcare workers will refer patients who were offered vaccination as part of their clinic attendance but who declined vaccination. Those participants who agree to participate will be invited to complete a brief survey to understand reasons for declining vaccination. The survey measures will include: if and where participants heard/learned about this drive for the influenza vaccination, if participants had seen any online messaging driving them to get the influenza vaccine or been exposed to specific community engagement activities, and whether it had influenced their decision to vaccinate.

As with all the surveys, the data costs will be covered as part of the project expenses. There will be no data costs to participants for completing the assessments. Participants will be reimbursed ZAR 50 airtime towards their time.

### C) Qualitative evaluation

Additional FGDs, including 10-12 participants per FGD, will be conducted: 8 mid-way through the intervention (during vaccination season) and 8 post-intervention. These FGDs will be mixed gender and will be stratified by age group (18-24, 25-34), and community (two per cluster). Key informant interviews (KII) (n=20) with key influencers including, religious leaders, traditional healers and youth leaders, as well as other influencers that may identified through community engagement and communications activities.

### Data Analysis

#### Qualitative data preparation and analysis plan

Qualitative data will be analysed using a Framework Analysis approach. Framework thematic analysis provides a highly systematic method of categorizing and organizing data according to key themes, concepts and emergent categories in grids or matrices [46]. The coding will follow a combined approach, i.e. both deductive based on our hypothesized themes and inductive (data-driven) to allow for emerging themes. The analysis will allow us to further refine the domains and will help identify sub-themes. Each transcript will be coded in Dedoose, a qualitative data analysis software by at least two researchers and assessed for consistency in coding of the first 5 transcripts [47]. The research team will convene to review the initial codes and apply general categories that will make up the analytic framework. Any coding disagreements will be discussed until agreement is reached. This analytical framework will then be applied to the remaining transcripts.

#### Statistical Analysis Plan

We will use descriptive statistics to describe study variables including: knowledge of influenza vaccines, experiences of influenza vaccine, stigma and vaccine confidence. Reliability assessments using the Cronbach alpha test will be evaluated for scale measures. Scales with poor reliability scores will be calibrated using factor analysis. Data will be analysed overall and stratified by community cluster. Frequencies will be determined for categorical measures whereas means (standard deviation) and medians (interquartile ranges) will be determined for continuous measures. Pairwise comparisons of categorical measures between communities will be evaluated by Chi-square or Fisher's exact test as appropriate; Similarly, pairwise continuous measures will be analysed by the two-sample t-test, if satisfying normality distribution conditions or the Wilcoxon Mann-Whitney test, if non-normal. Normality will be assessed by the Shapiro-Wilks method. Drivers of knowledge, stigma and experiences of influenza vaccines will be determined by logistic regression for binary outcomes and linear regression for continuous outcomes. Multivariable analysis will be done to adjust for potential confounders. Model fit statistics will be assessed on all multivariable regression models to ensure the validity of the findings. Data analyses will be conducted using SAS Enterprise Guide 7.15 [48].

#### Ethics statement

All research procedures were approved by the University of the Witwatersrand Human Research Ethics Committee (Medical) (M230254) and the local Department of Health. Participants were reimbursed ZAR 50 airtime for the surveys and ZAR 150 for the FGDs and the KIIs.



## Bias correction

While the study is designed to focus on four relatively distinct geographic areas, due to the nature of social media and health-seeking behaviours in the broader community of Soweto, it is possible that members from the intervention communities may interact with those not receiving the intervention. While potential interaction cannot be prevented entirely, research questions for all participants will include questions about exposure to intervention components and other potentially similar national or localised campaigns. In addition, a phased delivery of the interventions to ensure the offline intervention is not biased by the online intervention should help mitigate this.

It is also possible that those exposed to the intervention(s) may seek to be vaccinated in clinics that are not included in the study's geographically defined target-areas. An effort will be made to collaborate with the Department of Health to broadly understand influenza vaccinations during the campaign season, in broader Soweto and areas where residents typically seek healthcare. Vaccine and vaccination sentiments broadly in Soweto and South Africa will also be tracked during the course of the project for context and monitoring of potential risk.

## Funding

This project was funded by The Vaccine Confidence Fund II, a philanthropic and charitable fund of Global Impact. Grant ID: VCFII-011. Wits VIDA is an extramural unit of the South African Medical Research Council. The work reported herein for Janan J Dietrich was also made possible through funding by the South African Medical Research Council through its Division of Research Capacity Development under the Early Investigators Programme through funding received from the South African National Treasury. The content and findings reported/illustrated are the sole deduction, view and responsibility of the authors and do not reflect the official position and sentiments of the Vaccine Confidence fund and the SAMRC.

## Acknowledgements

We would like to extend our sincere gratitude to all study participants and beneficiaries, the Wits Vida study team, as well as the FreshNow Team for developing and delivering the content for the campaign.

## Conflicts of Interest

The authors report no conflicts of interest.

## References

1. World Health Organization. *Influenza (Seasonal)* 2023.
2. The National Institute for Communicable Diseases (NICD). 2023. *Increase in flu cases across the country(5 june 2023)*.
3. Langer, J., et al., *High Clinical Burden of Influenza Disease in Adults Aged  $\geq 65$  Years: Can We Do Better? A Systematic Literature Review*. *Advances in Therapy*, 2023. **40**(4): p. 1601-1627.
4. Gharpure, R., et al., *Costs and cost-effectiveness of influenza illness and vaccination in low- and middle-income countries: A systematic review from 2012 to 2022*. *PLOS Medicine*, 2024. **21**(1): p. e1004333.
5. Motlogeloa, O., J.M. Fitchett, and N. Sweijd, *Defining the South African Acute Respiratory Infectious Disease Season*. *Int J Environ Res Public Health*, 2023. **20**(2).
6. Hagiwara, Y., et al., *Seasonal influenza, its complications and related healthcare resource utilization among people 60 years and older: A descriptive retrospective study in Japan*. *PLoS One*, 2022. **17**(10): p. e0272795.
7. McMorrow, M.L., et al., *Prioritization of risk groups for influenza vaccination in resource limited settings - A case study from South Africa*. *Vaccine*, 2019. **37**(1): p. 25-33.
8. Comber, L., et al., *Systematic review of the efficacy, effectiveness and safety of high-dose seasonal influenza vaccines for the prevention of laboratory-confirmed influenza in individuals  $\geq 18$  years of age*. *Rev Med Virol*, 2023. **33**(3): p. e2330.
9. Andre, F.E., et al., *Vaccination greatly reduces disease, disability, death and inequity worldwide*. *Bull World Health Organ*, 2008. **86**(2): p. 140-6.

- 424 10. Antonelli Incalzi, R., et al., *Influenza vaccination for elderly, vulnerable and high-risk subjects: a*  
425 *narrative review and expert opinion*. Internal and Emergency Medicine, 2023.
- 426 11. The National Institute for Communicable Diseases (NICD). 2023. *Influenza: NICD recommendations*  
427 *for the diagnosis, management, prevention and public health response 2023*.
- 428 12. Diop, D., *Influenza-Associated Morbidity and Mortality in Sub-Saharan Africa*. International Journal  
429 of Vaccines & Vaccination, 2016. **2**(4).
- 430 13. Kaposy, C. and N. Bandrauk, *Prioritizing Vaccine Access for Vulnerable but Stigmatized Groups*.  
431 Public Health Ethics, 2012. **5**(3): p. 283-295.
- 432 14. Cohen, C., et al., *Asymptomatic transmission and high community burden of seasonal influenza in an*  
433 *urban and a rural community in South Africa, 2017&#x2013;18 (PHIRST): a population cohort study*.  
434 The Lancet Global Health, 2021. **9**(6): p. e863-e874.
- 435 15. Plans-Rubió, P., *The vaccination coverage required to establish herd immunity against influenza*  
436 *viruses*. Prev Med, 2012. **55**(1): p. 72-7.
- 437 16. Glezen, W.P., *Herd protection against influenza*. Journal of Clinical Virology, 2006. **37**(4): p. 237-  
438 243.
- 439 17. Tempia, S., et al., *Health and economic burden of influenza-associated illness in South Africa, 2013-*  
440 *2015*. Influenza Other Respir Viruses, 2019. **13**(5): p. 484-495.
- 441 18. Blanchet Zumofen, M.H., J. Frimpter, and S.A. Hansen, *Impact of Influenza and Influenza-Like Illness*  
442 *on Work Productivity Outcomes: A Systematic Literature Review*. Pharmacoeconomics, 2023. **41**(3):  
443 p. 253-273.
- 444 19. Ortiz, J.R. and K.M. Neuzil, *Influenza Immunization in Low- and Middle-Income Countries:*  
445 *Preparing for Next-Generation Influenza Vaccines*. The Journal of Infectious Diseases, 2019.  
446 **219**(Supplement\_1): p. S97-S106.
- 447 20. Alobwede, S.M., et al., *Influenza Vaccination Uptake and Hesitancy among Healthcare Workers in*  
448 *Early 2021 at the Start of the COVID-19 Vaccine Rollout in Cape Town, South Africa*. Vaccines, 2022.  
449 **10**(8): p. 1176.
- 450 21. Kim, A.W., et al., *Perceptions, risk and understandings of the COVID-19 pandemic in urban South*  
451 *Africa*. S Afr J Psychiatr, 2021. **27**: p. 1580.
- 452 22. Quinn, S.C., et al., *Measuring vaccine hesitancy, confidence, trust and flu vaccine uptake: Results of*  
453 *a national survey of White and African American adults*. Vaccine, 2019. **37**(9): p. 1168-1173.
- 454 23. Rodrigues, C.M.C. and S.A. Plotkin, *Impact of Vaccines; Health, Economic and Social Perspectives*.  
455 Front Microbiol, 2020. **11**: p. 1526.
- 456 24. Muthoni, J., et al., *COVID-19 Vaccination Hesitancy among Youths in Soweto, South Africa*. Vaccines  
457 (Basel), 2023. **11**(5).
- 458 25. Euser, S., et al., *Understanding COVID-19 vaccination willingness among youth: A survey study in*  
459 *the Netherlands*. Vaccine, 2022. **40**(6): p. 833-836.
- 460 26. Otwombe, K., et al., *Health-seeking behaviours by gender among adolescents in Soweto, South Africa*.  
461 Glob Health Action, 2015. **8**: p. 25670.
- 462 27. G, A.J.T., *Health Seeking Behaviours in South Africa: A Household Perspective using the General*  
463 *Households Survey of 2007*, in *Statistics and population Studies*. 2010, University of the Western Cape
- 464 28. Latunji, O.O. and O.O. Akinyemi, *factors influencing health-seeking behaviour among civil servants*  
465 *in ibadan, nigeria*. Ann Ib Postgrad Med, 2018. **16**(1): p. 52-60.
- 466 29. Hopkins, K.L., et al., *Community-Based Approaches to Increase COVID-19 Vaccine Uptake and*  
467 *Demand: Lessons Learned from Four UNICEF-Supported Interventions*. Vaccines, 2023. **11**(7): p.  
468 1180.
- 469 30. Hayward, A.C., et al., *Comparative community burden and severity of seasonal and pandemic*  
470 *influenza: results of the Flu Watch cohort study*. The Lancet Respiratory Medicine, 2014. **2**(6): p. 445-  
471 454.
- 472 31. Chantler, T., et al., *'We All Work Together to Vaccinate the Child': A Formative Evaluation of a*  
473 *Community-Engagement Strategy Aimed at Closing the Immunization Gap in North-West Ethiopia*.  
474 Int J Environ Res Public Health, 2018. **15**(4).
- 475 32. Jalloh, M.F., et al., *Association of community engagement with vaccination confidence and uptake: A*  
476 *cross-sectional survey in Sierra Leone, 2019*. J Glob Health, 2022. **12**: p. 04006.

- 477 33. Johnson, L.F., et al., *The Effect of HIV Programs in South Africa on National HIV Incidence Trends*,  
478 *2000–2019*. JAIDS Journal of Acquired Immune Deficiency Syndromes, 2022. **90**(2): p. 115-123.
- 479 34. Banerjee, A.V.a.L.F., Eliana and Orozco-Olvera, Victor H., T *The Entertaining Way to Behavioral*  
480 *Change: Fighting HIV with Mtv*. NBER Working Paper No. w26096, 2019.
- 481 35. Neely, S., C. Eldredge, and R. Sanders, *Health Information Seeking Behaviors on Social Media During*  
482 *the COVID-19 Pandemic Among American Social Networking Site Users: Survey Study*. J Med  
483 Internet Res, 2021. **23**(6): p. e29802.
- 484 36. Ventola, C.L., *Social media and health care professionals: benefits, risks, and best practices*. Pt, 2014.  
485 **39**(7): p. 491-520.
- 486 37. Jane, M., et al., *Social media for health promotion and weight management: a critical debate*. BMC  
487 Public Health, 2018. **18**(1): p. 932.
- 488 38. Project, V.C. *Vaccine Confidence Index Data & Methodology*. 2022; Retrieved [17 January 2024],  
489 from: <https://www.vaccineconfidence.org/vci/data-and-methodology/>.
- 490 39. The Centers for Disease Control and Prevention (CDC). 2022. *Wave 2 Vaccine Perceptions Survey in*  
491 *South Africa*. 2022, Vaccine Confidence Project.
- 492 40. City of Johannesburg. *About Region D*. 2018. Retrieved [21 February 2024], from:  
493 <https://joburg.org.za/about /regions/Pages/Region%20D%20-%20Greater%20Soweto/about-us.aspx>.
- 494 41. Statistics South Africa. *Youth still find it hard to secure jobs in South Africa*. 2021. Retrieved [11  
495 December 2023], from: <https://www.statssa.gov.za/?p=14415>.
- 496 42. Cunningham, S.A., et al., *Health and Demographic Surveillance Systems Within the Child Health and*  
497 *Mortality Prevention Surveillance Network*. Clinical Infectious Diseases, 2019. **69**(Supplement\_4): p.  
498 S274-S279.
- 499 43. Saunders, B., et al., *Saturation in qualitative research: exploring its conceptualization and*  
500 *operationalization*. Qual Quant, 2018. **52**(4): p. 1893-1907.
- 501 44. *RedCap*. 2004.
- 502 45. de Figueiredo, A., et al., *Mapping global trends in vaccine confidence and investigating barriers to*  
503 *vaccine uptake: a large-scale retrospective temporal modelling study*. Lancet, 2020. **396**(10255): p.  
504 898-908.
- 505 46. Gale, N.K., et al., *Using the framework method for the analysis of qualitative data in multi-disciplinary*  
506 *health research*. BMC Medical Research Methodology, 2013. **13**(1): p. 117.
- 507 47. 9.0.17, D.V., *cloud application for managing, analyzing, and presenting qualitative and mixed method*  
508 *research data*, C.S.R. Consultants, Editor. 2021: Los Angeles.
- 509 48. Institutue, S., *SAS Enterprise Guide 7.15* 2022.
- 510  
511  
512
